# Supplementary material for: A role for palindromic structures in the cis-region of maize Sirevirus LTRs in transposable element evolution and host epigenetic response
Source: HighWire-hosted journal article supplement (doi:10.1101/gr.193763.115), 2015-12-02
Supplement: Supplemental_Material.docx [file Supplemental_Material.docx]

**Supplemental Material**

**Phylogenetic analysis**

We investigated whether phylogenetic relationships within each family could be the driver for the increased siRNA cross-mapping between VY-VO, compared to VY-MA or MA-VO age groups. This high level of cross-mapping between VY and VO elements implies higher sequence conservation between these two groups. However, one expects sequence divergence to increase with age, whereby young elements are more likely to be similar to middle-aged than old elements. One scenario that could disrupt this expectation is the presence of clades with distinct phylogenetic histories within the *Ji* and *Opie* families; if VY and VO elements represent a distinct clade from MA elements, then they would share sequence characteristics to the exclusion of MA elements. To test this, we performed phylogenetic analysis based on the core domain (Pfam model PF07727) of the *reverse transcriptase* (*rt*) gene of Sireviruses. The *rt* sequences were first aligned using MAFFT with default parameters (Katoh and Standley 2013). Maximum likelihood phylogenetic analysis was next performed using the RAxML package with default parameters (Stamatakis 2014). Unexpectedly, bootstrap confidence levels were very low within each family resulting in unsupported clades (Figure S11A), which may reflect the amplification of most elements within a short timeframe. The same result was produced when we tested the core domain (Pfam model PF00665) of the *integrase* gene or even the complete *pol* open reading frame of a subset of elements (not shown). We note, however, that when we combined the two families, the *rt*-based tree strongly supported their division.

We nonetheless examined the relationship between age and siRNA species within individual clades, and nearly all followed the observed decrease and then increase in siRNA targeting as a function of age (Figure S11B-C), despite their smaller population sizes and varying age distributions (Figure S11D). The pattern remained consistent even when we examined *rt* clusters generated by clustering algorithms (Li and Godzik 2006) (not shown). Taken together, these results imply that the putative VY-VO siRNA ‘cross-talk’ is a property of Sirevirus evolution and not an artifact of phylogenetic history.

**Filtering cutoffs for the methylation analysis**

Due to the repetitive nature of the maize genome, sufficient coverage (≥2-fold) by uniquely mapped BS-seq reads was low (Figure S15A). This condition was more evident in young Sireviruses, because we detected a strong positive correlation between insertion age and the proportion of coverage, especially for elements up to ~2-2.5 million years (my) (Pearson *r* = 0.56 for the full-length sequence of all elements, *r* = 0.85 for the full-length sequence of elements up to 2my; *P* <10-20; Figure S15B). As a result, we devised an age-adjusted pipeline for setting coverage cutoffs (Figure S15C), in a similar manner to (Takuno and Gaut 2013) who selected different cutoffs for four grass genomes based on the level of ≥2-fold coverage of their genes. The age-adjusted windows were 0.5my long for Sireviruses up to 2my, after which the cutoff was the same for all elements. We also required a minimum number of cytosines with enough coverage (≥50 covered sites for each of the CG, CHG and CHH contexts for full-length elements; ≥15 for LTRs and ≥20 for the INT domain), a metric that was strongly correlated with the proportion of coverage (average Pearson *r* = 0.93 for the three contexts combined; *P* <10-20; Figure S15D). The subsets of the *Ji* and *Opie* populations that passed these filters are shown in Table S8. For examining the relationship between methylation and age, we excluded elements that had either reached their maximum (100% for CG and CHG) or minimum (0% for CHH) methylation levels (Table S8). We compared the results of the methylation analysis based on this pipeline to those produced by an age-independent filtering pipeline (see Figure S15C for the horizontal cutoff in the proportion of coverage; we also required ≥15 covered sites for each of the CG, CHG and CHH contexts and for each region under investigation). The two pipelines produced highly similar results, and hence we report the results of the age-adjusted filters.

**Bioinformatics analyses**

The bulk of bioinformatics analyses were performed using custom scripts with the Perl programming language (available here for reference and educational purposes: bat.infspire.org/sireviruses/GENOME_2015_193763/).

Their main functionality involved:

i) Parsing Sirevirus information: this included the selection of Sirevirus IDs from MASiVEdb to study or skip; the loading of phylogenetic and age information from the MASiVEdb table; and the loading of genomic coordinates from MASiVEdb GFF files.

ii) Parsing siRNA and methylation information: this included the loading of siRNA normalization data, i.e. the number of genomic locations to which an siRNA sequence mapped; the loading of siRNA and methylation genomic mapping coordinates from BED-formatted files (produced by a separate script that used as input the SAM-formatted output files of bwa and BS Seeker); and the checking of whether siRNA/methylation and Sirevirus coordinates overlapped. If the coordinates did overlap, then Sirevirus IDs, number of siRNA species (or expression), as well as the number of methylated cytosines, were stored in memory per genomic coordinate.

iii) Reporting information: this included the setting of the Sirevirus loci (i.e. full-length, LTRs and INT domain) and the ‘windows’ for reporting siRNA/methylation data; the translation of genomic coordinates to Sirevirus-loci-based coordinates; the allocation of siRNA/methylation mapping data from genomic coordinate to the appropriate window of each Sirevirus locus; and the printing of tables with all this information for downstream analyses.

**References**

Katoh K, Standley DM. 2013. MAFFT Multiple Sequence Alignment Software Version 7: Improvements in Performance and Usability. *Molecular Biology and Evolution* **30**: 772-780.

Li W, Godzik A. 2006. Cd-hit: a fast program for clustering and comparing large sets of protein or nucleotide sequences. *Bioinformatics* **22**: 1658-1659.

Stamatakis A. 2014. RAxML version 8: a tool for phylogenetic analysis and post-analysis of large phylogenies. *Bioinformatics* **30**: 1312-1313.

Takuno S, Gaut BS. 2013. Gene body methylation is conserved between plant orthologs and is of evolutionary consequence. *Proceedings of the National Academy of Sciences of the United States of America* **110**: 1797-1802.
