# Supplementary material for: A role for palindromic structures in the cis-region of maize Sirevirus LTRs in transposable element evolution and host epigenetic response
Source: HighWire-hosted journal article supplement (doi:10.1101/gr.193763.115), 2015-12-02
Supplement: Supplemental_Tables.docx [file Supplemental_Tables.docx]

**Table S1**. Number and proportion of siRNAs species from each library that mapped to the maize genome and to the 6,456 Sireviruses

| library | siRNA length | siRNA species | U_siRNA species | M_siRNA species | siRNAs on SVs | % of siRNAs on SVs | U on SVs | M on SVs | % of M_siRNAs on SVs |
| --- | --- | --- | --- | --- | --- | --- | --- | --- | --- |
| leaf | 21 | 620,225 | 320,485 | 299,740 | 20,280 | 3.3 | 199 | 20,081 | 6.7 |
| 22 | 642,138 | 305,734 | 336,404 | 31,829 | 5 | 335 | 31,494 | 9.4 |
| 24 | 3,400,238 | 2,077,067 | 1,323,171 | 92,708 | 2.7 | 3,115 | 89,593 | 6.8 |
| tassel | 21 | 145,374 | 61,720 | 83,654 | 8,296 | 5.7 | 35 | 8,261 | 9.9 |
| 22 | 174,045 | 60,742 | 113,303 | 15,204 | 8.7 | 66 | 15,138 | 13.4 |
| 24 | 1,035,543 | 627,271 | 408,272 | 23,467 | 2.3 | 342 | 23,125 | 5.7 |
| ear | 21 | 106,514 | 34,263 | 72,251 | 9,359 | 8.8 | 68 | 9,291 | 12.9 |
| 22 | 177,719 | 48,263 | 129,456 | 20,159 | 11.3 | 172 | 19,987 | 15.4 |
| 24 | 1,118,020 | 531,275 | 586,745 | 34,450 | 3.1 | 461 | 33,989 | 5.8 |
| ear_*mop1* | 21 | 199,244 | 60,727 | 138,517 | 22,671 | 11.4 | 185 | 22,486 | 16.2 |
| 22 | 529,402 | 141,805 | 387,597 | 63,755 | 12.0 | 711 | 63,044 | 16.3 |
| 24 | 276,851 | 95,244 | 181,607 | 27,434 | 9.9 | 290 | 27,144 | 14.9 |

Leaf corresponds to the library from Diez et al. (2014), the tassel library is from Zhang et al. (2009), and the immature ear wild-type and *mop1* libraries are from Nobuta et al. (2008). The ‘siRNA species’ column shows the total number of siRNA species that mapped to the maize genome at the end of the filtering pipeline. U_siRNAs, uniquely mapped siRNAs; M_siRNAs, multiply mapped siRNAs. SVs, 6,456 full-length Sireviruses.

**Table S2**. Number of siRNA species from each library that mapped to Sirevirus families

| Sirevirus family | # of elements | library | # of siRNA species in each family | | | | avg # of siRNA species per element | | |
| --- | --- | --- | --- | --- | --- | --- | --- | --- | --- |
| 21 | 22 | 24 | all | 21 | 22 | 24 |
| *Ji* | 3,285 | leaf | 10,375 | 15,690 | 52,649 | 78,714 | 946 | 1,497 | 1,686 |
| *Opie* | 2,926 | 4,270 | 5,942 | 27,975 | 38,187 | 483 | 692 | 1,375 |
| *Jienv* | 99 | 3,386 | 6,434 | 5,636 | 15,456 | 409 | 833 | 614 |
| *Giepum* | 102 | 563 | 606 | 4,476 | 5,645 | 134 | 143 | 704 |
| *Hopie* | 44 | 2,616 | 4,272 | 3,687 | 10,575 | 884 | 1,465 | 782 |
| **all** | **6,456** | **20,280** | **31,829** | **92,708** | **144,817** |  | | |
| *Ji* | 3,285 | tassel | 5,252 | 8,880 | 13,562 | 27,694 | 757 | 1,295 | 739 |
| *Opie* | 2,926 | 1,024 | 1,430 | 7,203 | 9,657 | 147 | 231 | 586 |
| *Jienv* | 99 | 1,237 | 3,202 | 1,361 | 5,800 | 132 | 380 | 171 |
| *Giepum* | 102 | 170 | 143 | 1,082 | 1,395 | 41 | 35 | 207 |
| *Hopie* | 44 | 1,086 | 2,049 | 819 | 3,954 | 376 | 744 | 213 |
| **all** | **6,456** | **8,296** | **15,204** | **23,467** | **46,967** |  | | |
| *Ji* | 3,285 | ear | 2,717 | 6,045 | 17,227 | 25,989 | 358 | 885 | 861 |
| *Opie* | 2,926 | 2,403 | 5,458 | 12,513 | 20,374 | 405 | 848 | 918 |
| *Jienv* | 99 | 3,429 | 5,864 | 2,370 | 11,663 | 409 | 929 | 334 |
| *Giepum* | 102 | 995 | 2,607 | 2,327 | 5,929 | 326 | 914 | 431 |
| *Hopie* | 44 | 332 | 886 | 1,071 | 2,289 | 62 | 158 | 178 |
| **all** | **6,456** | **9,359** | **20,159** | **34,450** | **63,968** |  | | |

Leaf corresponds to the library from Diez et al. (2014), the tassel library is from Zhang et al. (2009), and the immature ear library is from Nobuta et al. (2008). To allow for cross-family comparisons, the number of siRNA species that targeted on average each element of each family (column “avg # of siRNA species per element”) was normalized by using the family’s average length (*Ji*: 9,406nt; *Opie*: 8,930nt; *Jienv*: 12,040nt; *Giepum*: 12,610nt; *Hopie*: 11,740) and then multiplied by 10,000 to represent siRNA targeting to a consensus family length of 10kb.

**Table S3**. Total number of siRNAs species that mapped to *Ji* and *Opie* LTRs

| library | family | siRNA length | whole LTR | palindrome-rich region (%) | four palindrome  loci (%) |
| --- | --- | --- | --- | --- | --- |
| leaf | *Ji* | 24 | 33,574 | 17,469 (52) | 9,727 (29) |
| 22 | 5,476 | 2,781 (51) | 1,668 (30) |
| 21 | 5,070 | 2,850 (56) | 1,785 (35) |
| *Opie* | 24 | 13,271 | 7,106 (54) | 4,753 (36) |
| 22 | 1,986 | 932 (47) | 751 (38) |
| 21 | 1,913 | 1,054 (55) | 854 (45) |
| tassel | *Ji* | 24 | 8,961 | 5,216 (58) | 3,224 (36) |
| 22 | 1,776 | 974 (55) | 659 (37) |
| 21 | 1,682 | 1,126 (67) | 791 (47) |
| *Opie* | 24 | 3,666 | 1,825 (50) | 1,487 (41) |
| 22 | 559 | 328 (59) | 288 (52) |
| 21 | 560 | 376 (67) | 345 (62) |
| ear | *Ji* | 24 | 12,163 | 10,179 (84) | 6,405 (53) |
| 22 | 2,005 | 1,669 (83) | 1,135 (57) |
| 21 | 1,422 | 1,268 (89) | 884 (62) |
| *Opie* | 24 | 7,738 | 6,041 (78) | 4,687 (61) |
| 22 | 1,787 | 1,352 (76) | 1,121 (63) |
| 21 | 1,137 | 960 (84) | 805 (71) |

**Table S4**. Sirevirus populations and distribution across age groups.

| age group (my) | all families | *Ji* | *Opie* | *Jienv* | *Giepum* | *Hopie* |
| --- | --- | --- | --- | --- | --- | --- |
| all ages | 6,456 | 3,285 | 2,926 | 99 | 102 | 44 |
| 0 – 0.25 | 1,658 | 781 | 822 | 21 | 22 | 12 |
| 0.25 – 0.5 | 1,575 | 830 | 681 | 27 | 32 | 5 |
| 0.5 – 0.75 | 913 | 460 | 402 | 21 | 21 | 9 |
| 0.75 – 1 | 815 | 439 | 345 | 17 | 11 | 3 |
| 1 – 1.25 | 611 | 319 | 275 | 7 | 5 | 5 |
| 1.25 – 1.5 | 306 | 149 | 147 | 4 | 4 | 2 |
| 1.5 – 1.75 | 178 | 96 | 76 | 1 | 3 | 2 |
| 1.75 – 2 | 107 | 65 | 39 |  | 2 | 1 |
| 2 – 2.5 | 121 | 65 | 49 |  | 2 | 5 |
| 2.5 – 3 | 35 | 25 | 10 |  |  |  |
| >3 | 137 | 56 | 80 | 1 |  |  |
| very young (<0.5) | 3,233 | 1,611 | 1,503 | 48 | 54 | 17 |
| middle-aged (1.5-2.0) | 285 | 161 | 115 | 1 | 5 | 3 |
| very old (>3) | 137 | 56 | 80 | 1 |  |  |

Age is shown in million years (my).

**Table S5**. Average number of 24nt siRNA species of the leaf library that targeted *Ji* and *Opie* elements of different age groups.

| age group | | Sirevirus domains | | | | |
| --- | --- | --- | --- | --- | --- | --- |
| FL | INT | 5’LTR | 3’LTR | both LTRs |
| Ji | VY | 1,730 | 1,254 | 435 | 430 | 476 |
| MA | 1,150 | 776 | 262 | 261 | 374 |
| VO | 1,662 | 1,054 | 358 | 341 | 608 |
| Opie | VY | 1,396 | 1,061 | 305 | 302 | 334 |
| MA | 680 | 505 | 116 | 114 | 176 |
| VO | 1,402 | 956 | 263 | 268 | 446 |

VY, very young (<0.5my); MA , middle-aged (1.5-2.0my); VO, very old (>3my).

**Table S6**. ‘Cross-talk’ of 24nt siRNA species among Sirevirus age groups.

|  | *Ji* population | | | *Opie* population | | | both families | | |
| --- | --- | --- | --- | --- | --- | --- | --- | --- | --- |
| single element  within an age group | VY | MA | VO | VY | MA | VO | VY | MA | VO |
| VY |  | 84.9 | 92.3 |  | 68.1 | 97.6 |  | 76.8 | 94.9 |
| MA | 56.7 |  | 73.4 | 55.7 |  | 70.1 | 56.3 |  | 72 |
| VO | 83.2 | 86.5 |  | 94.5 | 65 |  | 89.9 | 73.8 |  |

Numbers indicate the proportion of siRNA species from the leaf library that mapped both to the LTRs of a single element of one age group and to the LTRs of one or more elements of another age group. VY, very young; MA, middle-aged; VO, very old.

**Table S7**. siRNA ‘cross-talk’ among triplets of VY, MA and VO elements.

| family | tissue | siRNA length | avg. # of siRNA species per triplet | VY1 | MA1 | VO1 | all1 | VY_MA1 | VY_VO1 | MA_VO1 |
| --- | --- | --- | --- | --- | --- | --- | --- | --- | --- | --- |
| *Ji* | leaf | 21 | 442 | 28.0 | 21.1 | 29.7 | 3.5 | 2.4 | 10.3 | 5.0 |
| 22 | 464 | 27.4 | 19.8 | 33.2 | 2.2 | 2.1 | 10.3 | 5.0 |
| 24 | 1,248 | 28.5 | 23.5 | 33.0 | 1.8 | 1.9 | 7.0 | 4.3 |
| tassel | 21 | 220 | 28.8 | 16.9 | 27.1 | 3.5 | 2.7 | 16.2 | 4.8 |
| 22 | 224 | 33.3 | 15.4 | 23.3 | 4.4 | 4.2 | 13.5 | 5.9 |
| 24 | 594 | 26.9 | 19.7 | 34.8 | 2.1 | 1.5 | 11.8 | 3.2 |
| ear | 21 | 160 | 23.0 | 20.6 | 30.8 | 4.6 | 2.7 | 12.3 | 6.0 |
| 22 | 210 | 25.4 | 19.5 | 31.0 | 3.7 | 2.4 | 13.1 | 4.9 |
| 24 | 685 | 26.8 | 22.9 | 33.4 | 2.3 | 2.5 | 8.1 | 4.0 |
| *Opie* | leaf | 21 | 220 | 21.3 | 16.7 | 32.0 | 6.2 | 1.8 | 18.6 | 3.4 |
| 22 | 211 | 21.6 | 12.9 | 35.4 | 7.3 | 1.7 | 18.2 | 2.9 |
| 24 | 762 | 25.5 | 16.1 | 37.3 | 4.1 | 0.8 | 14.3 | 1.9 |
| tassel | 21 | 102 | 18.6 | 14.5 | 26.4 | 9.6 | 1.8 | 24.9 | 4.2 |
| 22 | 84 | 16.1 | 12.8 | 30.6 | 13.0 | 1.6 | 22.3 | 3.6 |
| 24 | 339 | 24.8 | 13.7 | 36.8 | 4.9 | 1.5 | 16.2 | 2.1 |
| ear | 21 | 172 | 17.5 | 15.4 | 28.8 | 9.4 | 1.3 | 24.3 | 3.3 |
| 22 | 259 | 20.1 | 12.9 | 31.3 | 8.9 | 1.8 | 21.3 | 3.7 |
| 24 | 593 | 23.5 | 16.9 | 34.8 | 5.1 | 1.6 | 15.6 | 2.5 |

1Numbers indicate the average proportion of siRNA species that mapped to each category across the 27,000 triplets for each combination of tissue and siRNA length. VY, very young; MA, middle-aged; VO, very old.

**Table S8**. Number of *Ji* and *Opie* elements that were included in the methylation analysis.

| methylation filters | *Ji* | | *Opie* | |
| --- | --- | --- | --- | --- |
| LTR | INT | LTR | INT |
| main coverage pipeline | 2,812 | 864 | 2,579 | 1,135 |
| no loci with 100% CG meth. | 1,942  69% | 842  97% | 1,713  66% | 1,085  96% |
| no loci with 100% CHG meth. | 2,743  98% | 864  100% | 2,527  98% | 1,126  99% |
| no loci with 0% CHH meth. | 1,462  52% | 644  75% | 1,346  52% | 872  77% |

The percentages indicate the fraction of the populations of the main coverage pipeline after excluding LTRs or INT domains that had either 100% CG or CHG, or 0% CHH methylation levels.
